# Supplementary material
Source: HighWire-hosted journal article supplement (https://bibliotheek.ehb.be/content/7/1/68)
Supplement: inline-supplementary-material-1 [file inline-supplementary-material-1.pdf]

|                          |  |
|--------------------------|--|
| <b>Full name</b>         |  |
| <b>Role, grade, ward</b> |  |

West Suffolk Hospital has trialled Medic Bleep, a secure instant communication app with 1) Trauma and Orthopaedics and 2) Paediatrics, Midwives and Community Midwives. This questionnaire aims to learn about your experience during the pilot.

| MEDIC BLEEP                                                                     |            |                                                                 |                  |                |
|---------------------------------------------------------------------------------|------------|-----------------------------------------------------------------|------------------|----------------|
| <b>Which device(s) did you use Medic Bleep on? Please circle:</b>               |            |                                                                 |                  |                |
| Trust Desktop / WOW                                                             | Trust iPad | Trust iPod Touch                                                | My Android Phone | My Apple Phone |
| <b>Was it easy to complete the registration process?</b>                        |            |                                                                 |                  |                |
| Yes                                                                             | No         | If 'no', please explain why and what would have made it better: |                  |                |
|                                                                                 |            |                                                                 |                  |                |
| <b>How was your training? Please circle the words that best describe it:</b>    |            |                                                                 |                  |                |
| Helpful                                                                         | Quick      | Sufficient                                                      | Other comments:  |                |
| Not helpful                                                                     | Long       | Not sufficient                                                  |                  |                |
| <b>Have you found it easy to adopt and use Medic Bleep in your working day?</b> |            |                                                                 |                  |                |
| Yes                                                                             | No         | If 'no', please explain why and what would have made it easier: |                  |                |
|                                                                                 |            |                                                                 |                  |                |
| <b>What do you like about Medic Bleep?</b>                                      |            |                                                                 |                  |                |
|                                                                                 |            |                                                                 |                  |                |
| <b>What do you not like about Medic Bleep?</b>                                  |            |                                                                 |                  |                |
|                                                                                 |            |                                                                 |                  |                |
| <b>What were your 3 main uses of Medic Bleep?</b>                               |            |                                                                 |                  |                |
| 1                                                                               |            |                                                                 |                  |                |
| 2                                                                               |            |                                                                 |                  |                |
| 3                                                                               |            |                                                                 |                  |                |

|                                                                                            |    |                                                        |   |   |   |   |   |   |   |   |    |                                      |
|--------------------------------------------------------------------------------------------|----|--------------------------------------------------------|---|---|---|---|---|---|---|---|----|--------------------------------------|
| <b>Would you recommend Medic Bleep to your colleagues?</b> <i>Please circle from 1-10:</i> |    |                                                        |   |   |   |   |   |   |   |   |    |                                      |
| <i>Not likely to recommend</i>                                                             |    | 1                                                      | 2 | 3 | 4 | 5 | 6 | 7 | 8 | 9 | 10 | <i>Extremely likely to recommend</i> |
| <b>Do you want to use Medic Bleep after the pilot?</b>                                     |    |                                                        |   |   |   |   |   |   |   |   |    |                                      |
| Yes                                                                                        | No | <i>Please explain why you have said 'yes' or 'no':</i> |   |   |   |   |   |   |   |   |    |                                      |

| COMMUNICATION WITH COLLEAGUES IN YOUR BASE WARD                                                                                                                                               |                            |  |                                        |
|-----------------------------------------------------------------------------------------------------------------------------------------------------------------------------------------------|----------------------------|--|----------------------------------------|
| <b>Number in order the communication methods you used during the pilot</b><br>1: communication most used - 5: communication least used                                                        |                            |  |                                        |
|                                                                                                                                                                                               | Medic Bleep                |  | Wait for team member to return to ward |
|                                                                                                                                                                                               | Pager                      |  | WhatsApp                               |
|                                                                                                                                                                                               | In person                  |  | Other: .....                           |
| <b>Using Medic Bleep, how long on average did it take to get a response back from the individual you contacted?</b><br><i>Please select:</i>                                                  |                            |  |                                        |
|                                                                                                                                                                                               | 0-5 min                    |  | I give up                              |
|                                                                                                                                                                                               | 5-15 min                   |  | Use indirect information               |
|                                                                                                                                                                                               | 15-30 min                  |  | I refer to my colleague to follow up   |
|                                                                                                                                                                                               | > 1 hour                   |  | Other: .....                           |
| <i>Please circle:</i><br><b>Medic Bleep is</b> faster than / the same as / slower than <b>using the pager to get a response back</b>                                                          |                            |  |                                        |
| <b>Using Medic Bleep, how long on average did you wait for a response before you could complete your patient's management/discharge plan? Please select:</b>                                  |                            |  |                                        |
|                                                                                                                                                                                               | 0-5 min                    |  | 30-60 min                              |
|                                                                                                                                                                                               | 5-15 min                   |  | > 1 hour                               |
|                                                                                                                                                                                               | 15-30 min                  |  | I refer to my colleague to follow up   |
| <i>Please circle:</i><br><b>Medic Bleep is</b> faster than / the same as / slower than <b>using the pager to get a response before I can complete my patient's management/ discharge plan</b> |                            |  |                                        |
| <b>Has Medic Bleep improved communication between you and your colleagues during the day?</b><br><i>Please circle:</i>                                                                        |                            |  |                                        |
| Greatly improved                                                                                                                                                                              | <i>Please explain why:</i> |  |                                        |
| Improved                                                                                                                                                                                      |                            |  |                                        |
| Same                                                                                                                                                                                          |                            |  |                                        |
| Worsened                                                                                                                                                                                      |                            |  |                                        |
| Greatly worsened                                                                                                                                                                              |                            |  |                                        |

**IMPACT OF COMMUNICATION****Has using Medic Bleep had an impact on your productivity?** *Please circle the statements which are relevant to you:*

I am less distracted in my workflow

I can prioritise my work better

It is helpful to communicate in a message to a colleague so I don't have to remember in the back of my mind what I need to say

I spend less time waiting by a phone for a response

*Please describe other impacts you experienced:***Has using Medic Bleep had an impact on patient care?** *Please circle the statements which are relevant to you:*

I can escalate care earlier

I can see more patients

I have more time with patients

TTOs are completed more quickly

*Please describe other impacts on patient care:***PILOT PROGRAMME****How did you find out about the Medic Bleep trial?** *Please select from below:*

Manager

Medic Bleep Team

Colleague

Patient information leaflet

Email

Other: .....

**Did you receive sufficient and timely communication:****\*Before the trial****\*During the trial***If 'no', please explain why and what would have made it better:*

Yes

No

Yes

No

*Please circle below the statement relevant to you. The information provided, namely the faq's and user guidance was:*

Very helpful

*Please explain why:*

Helpful

Not helpful

Did not receive it

**Were you happy with the support provided during the pilot?**

Yes

No

*If 'no', please explain why and what would have made it better:***Did you have any challenges or concerns during the pilot?**

Yes

No

*If 'yes', please explain why and what would have made it better:*

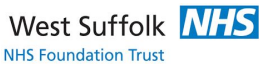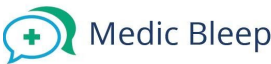

West Suffolk NHS Foundation Trust  
Medic Bleep Pilot Program

|                                                                                                                                                                |                                                                                      |  |
|----------------------------------------------------------------------------------------------------------------------------------------------------------------|--------------------------------------------------------------------------------------|--|
|                                                                                                                                                                |                                                                                      |  |
| <b>How have patients and relatives responded to you and your colleagues using Medic Bleep?</b><br><i>Please circle below the statement(s) relevant to you:</i> |                                                                                      |  |
| With comfort and ease - they understood I was using Medic Bleep for work purposes                                                                              | <i>Please explain why, in particular if you selected 'not with comfort or ease':</i> |  |
| With happiness - they experienced an improvement in their care because of the faster communication                                                             |                                                                                      |  |
| Not with comfort or ease                                                                                                                                       |                                                                                      |  |
| <b>After the pilot, how do you feel about using your own device?</b>                                                                                           |                                                                                      |  |
| Comfortable                                                                                                                                                    | <i>Please explain why:</i>                                                           |  |
| Not Comfortable                                                                                                                                                |                                                                                      |  |
| <b>What advice would you give colleagues about using their own device?</b>                                                                                     |                                                                                      |  |
|                                                                                                                                                                |                                                                                      |  |
| <b>What advice would you give the Trust about using your own device?</b>                                                                                       |                                                                                      |  |
|                                                                                                                                                                |                                                                                      |  |
